# Supplementary material for: Superlattices, Bonding-Antibonding, Fermi Surface Nesting, and Superconductivity
Source: MDPI journal article supplement (doi:10.3390/condmat8030072), 2023-08-15
Supplement: s1 [file s1]

## Supplementary Information

Table S1. Summary of k-grid dependence for band energies at key symmetry points for MgB<sub>2</sub> with P6/mmm or P-6c2 symmetry. Standard deviations for P-6c2 calculations for  $k < 0.013 \text{ \AA}^{-1}$  are less than 1meV.

| Space Group | Pressure (GPa) | n | k (Å <sup>-1</sup> ) | G (meV) | A (meV) | E <sub>w</sub> (meV)      |                      |         |         |        |           |
|-------------|----------------|---|----------------------|---------|---------|---------------------------|----------------------|---------|---------|--------|-----------|
| P6/mmm      | 0              | 1 | 0.020                | 403.770 | 787.415 | 595.593                   |                      |         |         |        |           |
|             | 0              | 1 | 0.010                | 400.000 | 782.440 | 591.220                   |                      |         |         |        |           |
|             | 0              | 1 | 0.005                | 399.290 | 781.740 | 590.515                   |                      |         |         |        |           |
|             |                |   |                      |         |         |                           |                      |         |         |        |           |
| Space Group | Pressure (GPa) | n | k (Å <sup>-1</sup> ) | G (meV) |         | A (E <sub>0</sub> ) (meV) | E <sub>w</sub> (meV) | ΔE1     | ΔE2     | 2Δ     | Comment   |
| P-6c2       | 0              | 2 | 0.013                | 398.500 | 780.340 | 581.570                   | 589.420              | 198.770 | 183.070 | 15.700 | All degen |
|             | 0              | 2 | 0.010                | 398.500 | 780.341 | 581.566                   | 589.420              | 198.775 | 183.066 | 15.709 | All degen |
|             | 0              | 2 | 0.005                | 398.800 | 781.390 | 582.210                   | 590.095              | 199.180 | 183.410 | 15.770 | All degen |
|             |                |   | Average              | 398.600 | 780.690 | 581.782                   | 589.645              | 198.908 | 183.182 | 15.726 |           |
|             |                |   | StdDev               | 0.173   | 0.606   | 0.371                     | 0.390                | 0.235   | 0.197   | 0.038  |           |

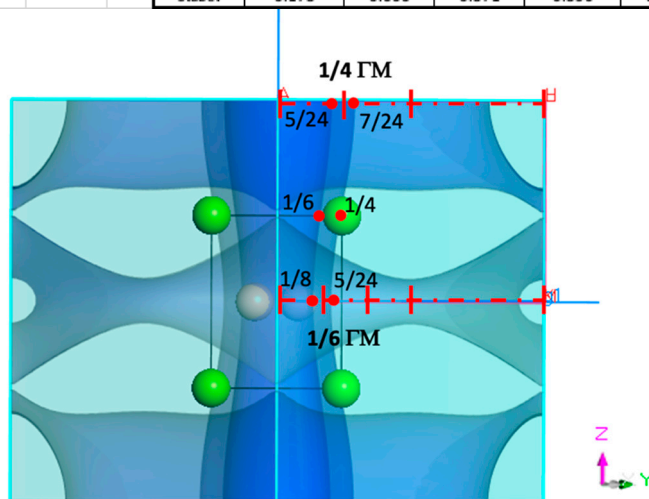

Figure S1. Fermi surfaces for MgB<sub>2</sub> with attributed P6/mmm symmetry. Approximate geometrical relationships for the radii of the light (inner) and heavy (outer) effective mass tubular sections are labelled (see also Figure S9 of reference [50] in the article).

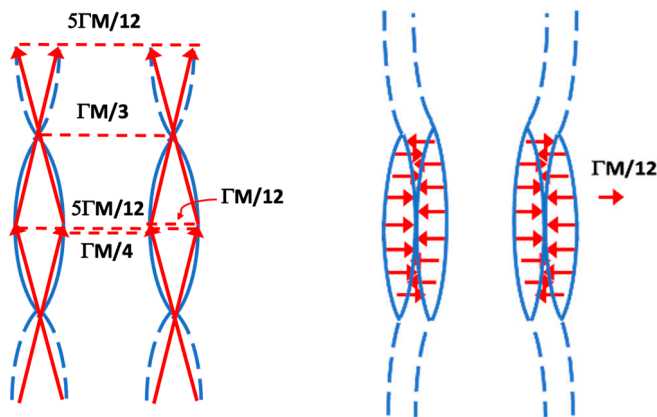

Figure S2. (a) Nesting vectors on either side of the folded light effective mass Fermi surface. Fermi surface nesting is prevalent for the double superlattice with vector approximately  $\Gamma M/3$  long (see Figures 5 and 6). (b) Schematic of the folded inner and outer tubular Fermi surfaces for the double (2x), whose DFT calculated graph was shown in Figure 6. Fermi surface nesting between inner and outer tubes at short wavevector ( $\Gamma M/12$ ) can be identified to the right.

Nesting vectors of average dimensions (approximately  $5\Gamma M/12$  long) also connect the tubular sections of light effective mass to the heavy effective mass in addition to short wavevectors that connect the same sides of each respective tubular section. These short wavevectors are approximately  $\Gamma M/12$  long. Thus, ten nesting vectors, three longer horizontal ( $\Gamma M/3$ ,  $\Gamma M/2$  and  $5\Gamma M/12$  long), one short horizontal ( $\Gamma M/12$  long) and six diagonals with horizontal components given by three longer horizontal nesting vectors, respectively, can be defined.

With respect to the modified tight binding equations (section 3.2), for convenience, we equate  $\Delta = 2\hbar\omega$ ,

$$\left\{ \begin{array}{l} E_n(k_x, k_y, k_z) = E_0 - (2t_{\perp}^n - 2\hbar\omega) \cos(ck_z) - \hbar^2 (k_x^2 + k_y^2) / 2m_n, \\ 0 \leq ck_z \leq \frac{\pi}{2} \quad (S1) \\ E_n(k_x, k_y, k_z) = E_0 - (2t_{\perp}^n + 2\hbar\omega) \cos(ck_z) - \hbar^2 (k_x^2 + k_y^2) / 2m_n, \\ \frac{\pi}{2} \leq ck_z \leq \pi \quad (S2) \end{array} \right.$$

Since  $\hbar\omega$  is relatively small compared to  $2t_{\perp}$  and 1 in eV units, we can write  $\hbar\omega \approx \sin(\hbar\omega)$ ,

$$\left\{ \begin{array}{l} E_n(k_x, k_y, k_z) = E_0 - 2t_{\perp}^n \cos(ck_z) + 2 \sin(\hbar\omega) \cdot \cos(ck_z) - \hbar^2 (k_x^2 + k_y^2) / 2m_n, \\ 0 \leq ck_z \leq \frac{\pi}{2} \quad (S3) \\ E_n(k_x, k_y, k_z) = E_0 - 2t_{\perp}^n \cos(ck_z) - 2 \sin(\hbar\omega) \cdot \cos(ck_z) - \hbar^2 (k_x^2 + k_y^2) / 2m_n, \\ \frac{\pi}{2} \leq ck_z \leq \pi \quad (S4) \end{array} \right.$$

These equations (i.e., Eqs. S2a & S2b) can then be written as the following combination of cosine and sine functions:

$$E_n(k_x, k_y, k_z) = E_0 - 2t_{\perp}^n \cos(ck_z) + \sin(\hbar\omega + ck_z) + \sin(\hbar\omega - ck_z) - \hbar^2 (k_x^2 + k_y^2) / 2m_n ,$$

$$0 \leq ck_z \leq \frac{\pi}{2} \quad (\text{S5})$$

$$E_n(k_x, k_y, k_z) = E_0 - 2t_{\perp}^n \cos(ck_z) - [\sin(\hbar\omega + ck_z) + \sin(\hbar\omega - ck_z)]$$

$$- \hbar^2 (k_x^2 + k_y^2) / 2m_n ,$$

$$\frac{\pi}{2} \leq ck_z \leq \pi \quad (\text{S6})$$
